# Supplementary material for: Rhamnolipids Nano-Micelles as a Potential Hand Sanitizer
Source: MDPI journal article supplement (doi:10.3390/antibiotics10070751), 2021-06-22
Supplement: s1 [file s1]

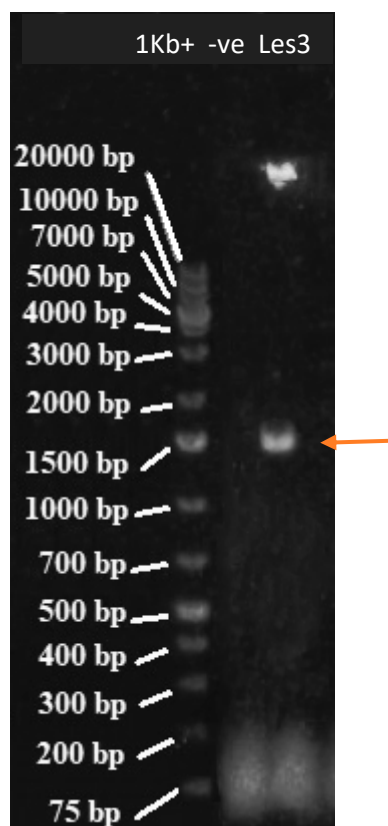

**Figure S1.** PCR amplification products of 16S-rRNA encoding genes of *Pseudomonas aeruginosa* strain LeS3 showed a fragment length of 1500 bp. (1Kb +) refers to DNA ladder. (-ve) refers to negative control: no amplification confirms no PCR contamination.
